# Supplementary material for: Facile synthesis of cationic covalent organic frameworks with abundant protonated pyridine nitrogen groups for selective absorption of organic dyes
Source: Royal Society of Chemistry journal article supplement (doi:10.1039/d4nj05381h), 2025-01-01
Supplement: d4nj05381h1.pdf [file d4nj05381h1.pdf]

## Facile synthesis of cationic covalent organic frameworks with abundant protonated pyridine nitrogen groups for selective absorption of organic dyes

Shuanglong Lu\*, Kunpeng Zhang, Yu Wu, Fang Duan, Mingliang Du

Key Laboratory of Synthetic and Biological Colloids, Ministry of Education, School of Chemical and Material Engineering, Jiangnan University, Wuxi, Jiangsu 214122, P. R. China.

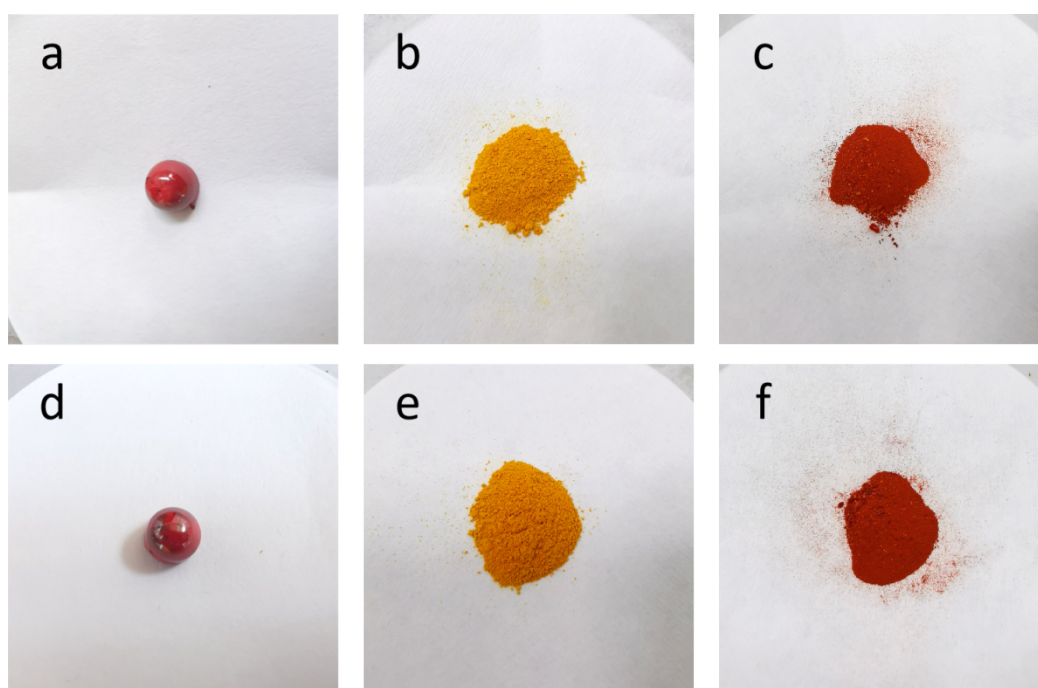

**Fig. S1** Pictures of crude product for S (a), S-COF (b), S-iCOF (c), crude product for L (d), L-COF (e) and L-iCOF (f).

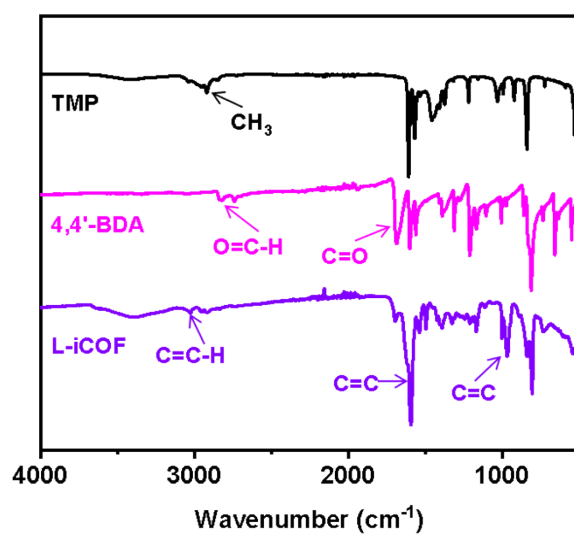

Fig. S2 FT-IR spectra of L-iCOF and corresponding monomers.

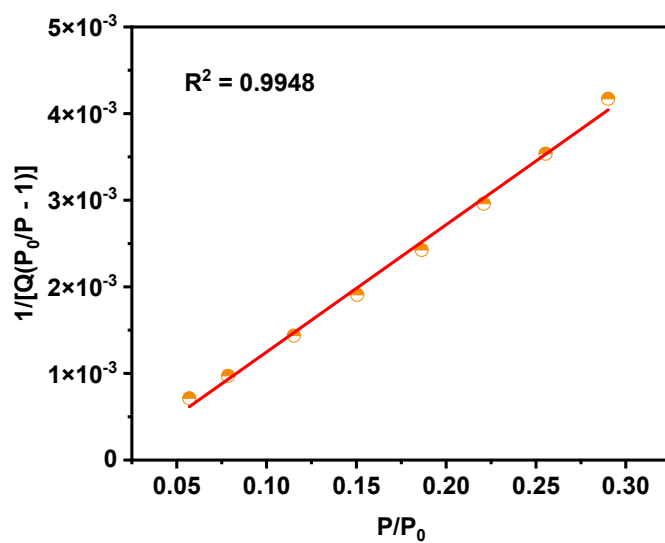

Fig. S3 BET surface area plot calculated from isotherms of S-iCOF ( $R^2 = 0.9948$ ).

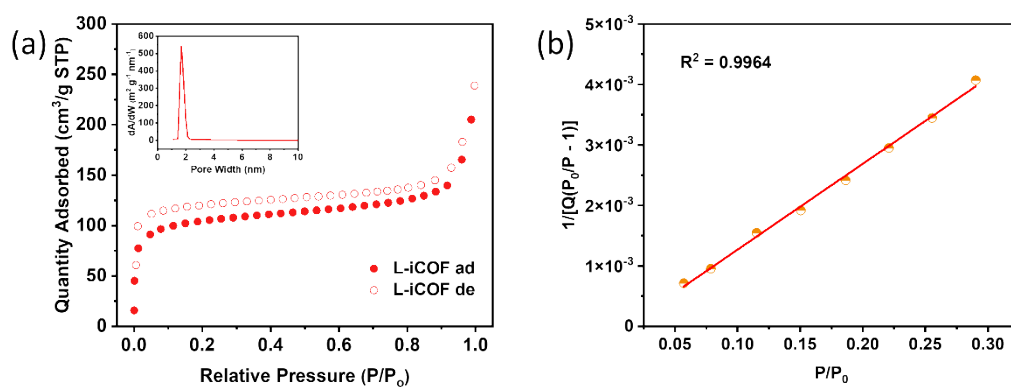

**Fig. S4** (a)  $N_2$  adsorption-desorption isotherms of L-iCOF at 77 K. Inset: pore distribution calculated by quenched solid density functional theory. (b) BET surface area plot calculated from isotherms of L-iCOF ( $R^2=0.9964$ ).

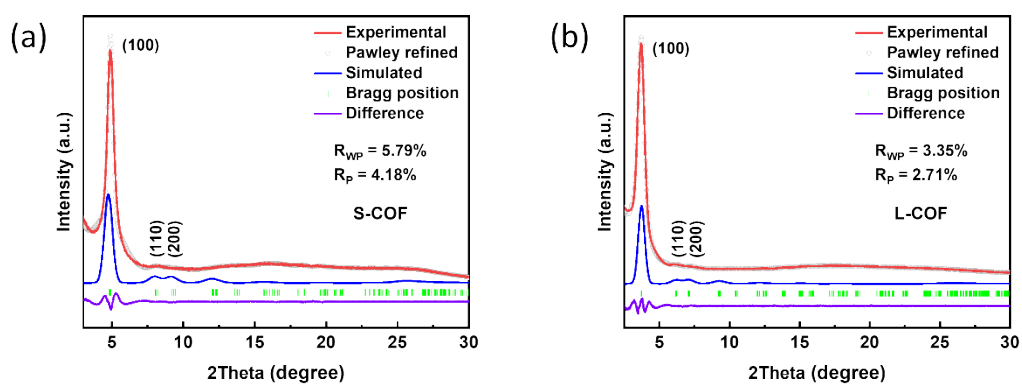

**Fig. S5** PXRD patterns of (a) S-COF and (b) L-COF.

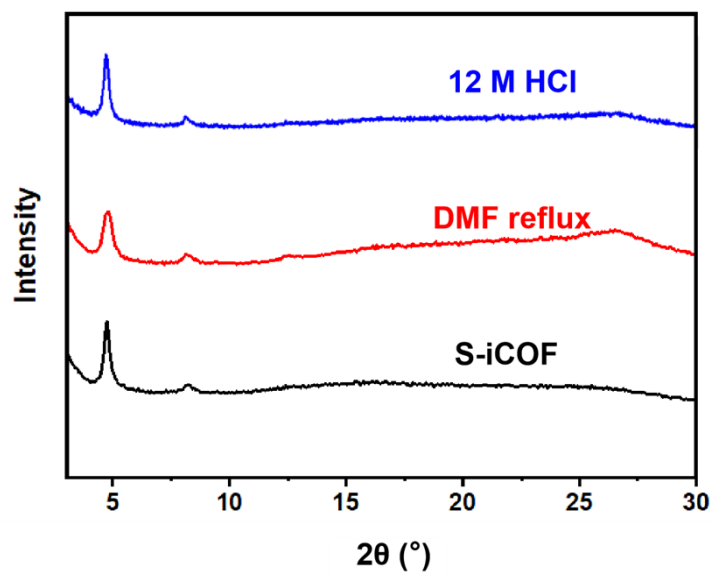

**Fig. S6** PXR D patterns of S-iCOF after soaking in concentrated acid and boiling DMF.

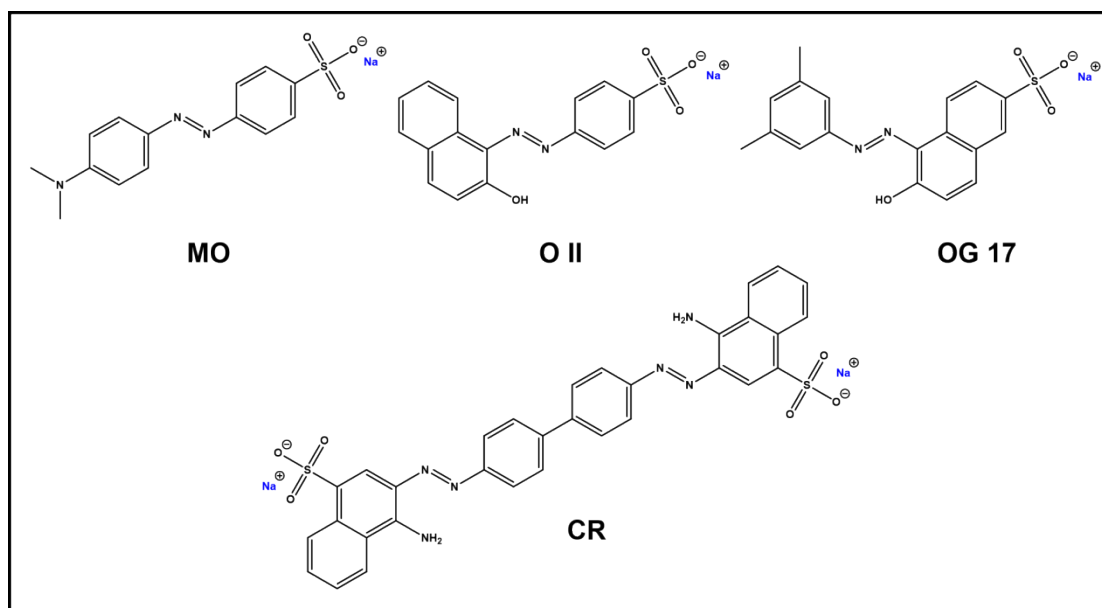

**Fig. S7** Molecular structures of anionic organic dyes used in this work.

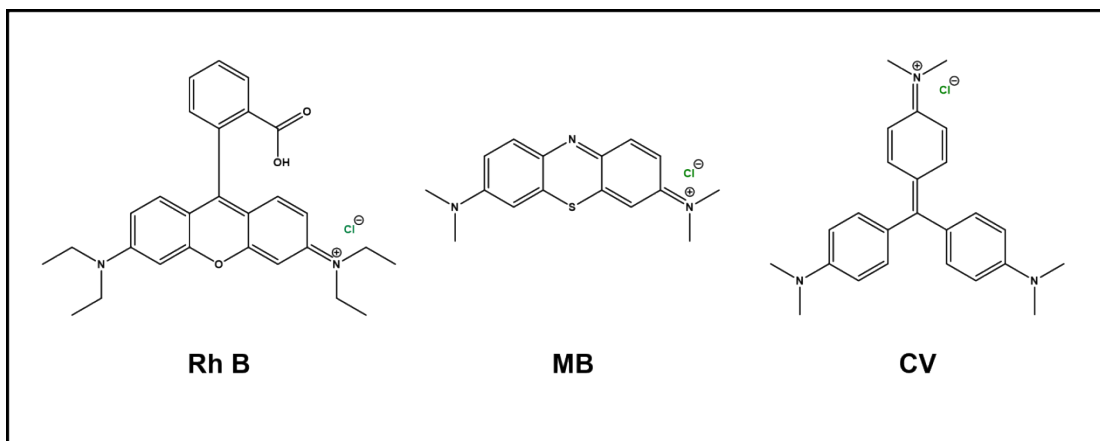

**Fig. S8** Molecular structures of non-anionic organic dyes used in this work.

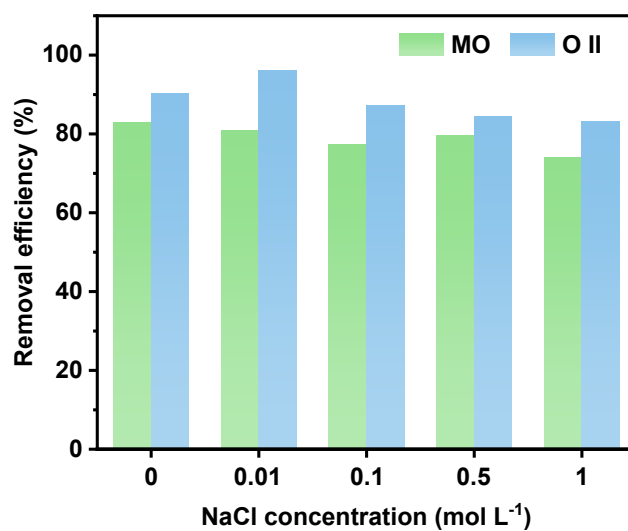

**Fig. S9** Effect of ionic strength on the removal efficiency of S-iCOF for MO and O II ( $C_0 = 30 \text{ mg L}^{-1}$ ) at 25 °C.

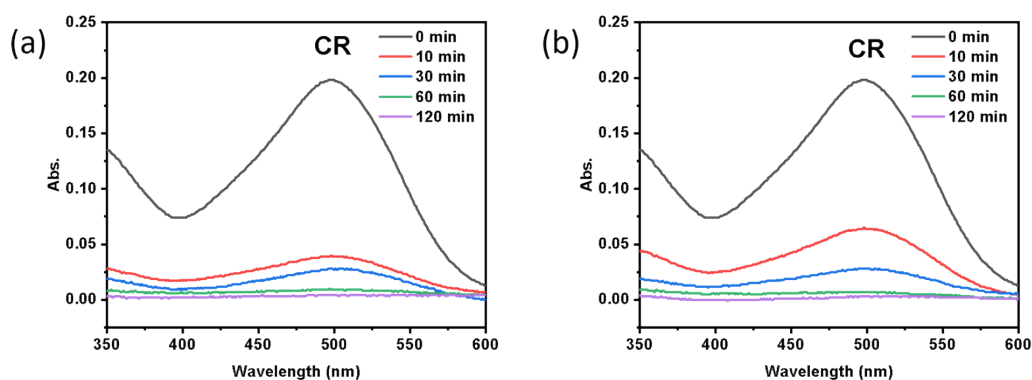

**Fig. S10** UV/Vis absorption spectra of aqueous CR ( $C_0 = 20 \text{ mg L}^{-1}$ ) Stirred treatment with (a) S-iCOF and (b) L-iCOF at the given times at  $25 \text{ }^\circ\text{C}$ .

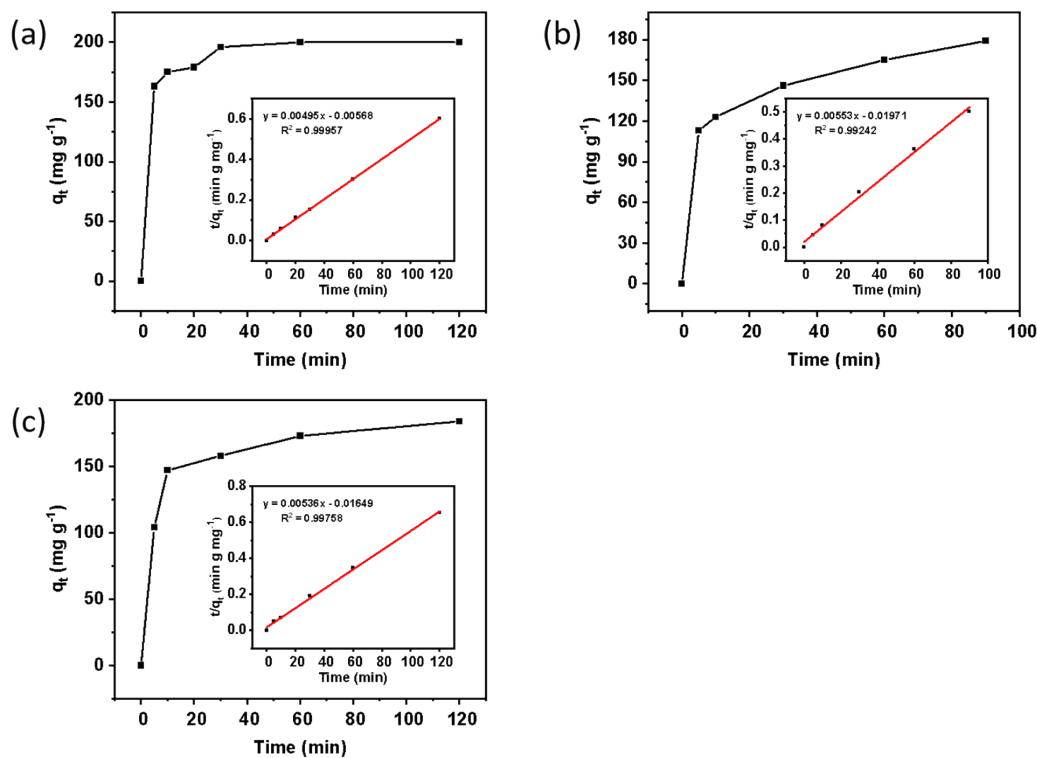

**Fig. S11** Adsorption kinetics of L-iCOF toward aqueous (a) MO ( $C_0 = 20 \text{ mg L}^{-1}$ ), (b) O II ( $C_0 = 20 \text{ mg L}^{-1}$ ) and (c) OG 17 ( $C_0 = 20 \text{ mg L}^{-1}$ ) solutions at  $25 \text{ }^\circ\text{C}$ . The insets show the pseudo-second-order kinetic plots of corresponding dye.

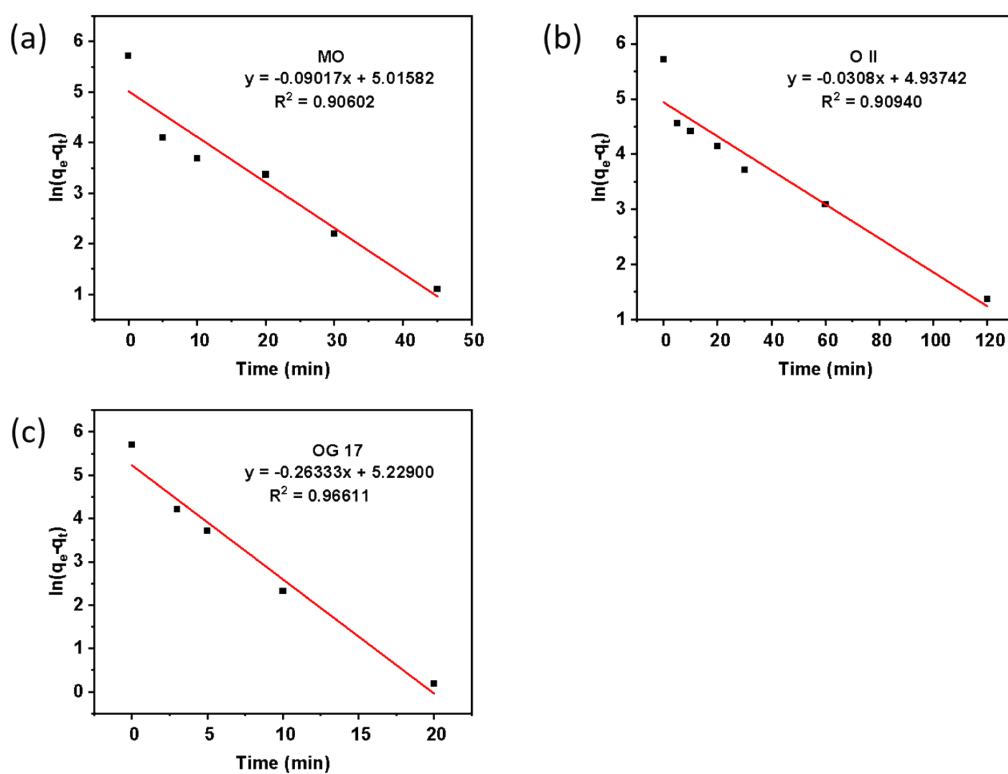

**Fig. S12** Plots of pseudo-first-order kinetic on S-iCOF toward aqueous (a) MO ( $C_0 = 30 \text{ mg L}^{-1}$ ), (b) O II ( $C_0 = 30 \text{ mg L}^{-1}$ ) and (c) OG 17 ( $C_0 = 30 \text{ mg L}^{-1}$ ) solutions at 25 °C.

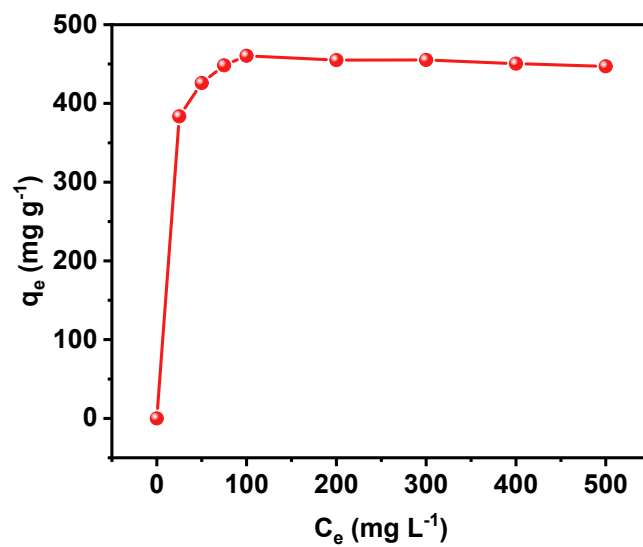

**Fig. S13** Adsorption isotherms of S-iCOF for O II.

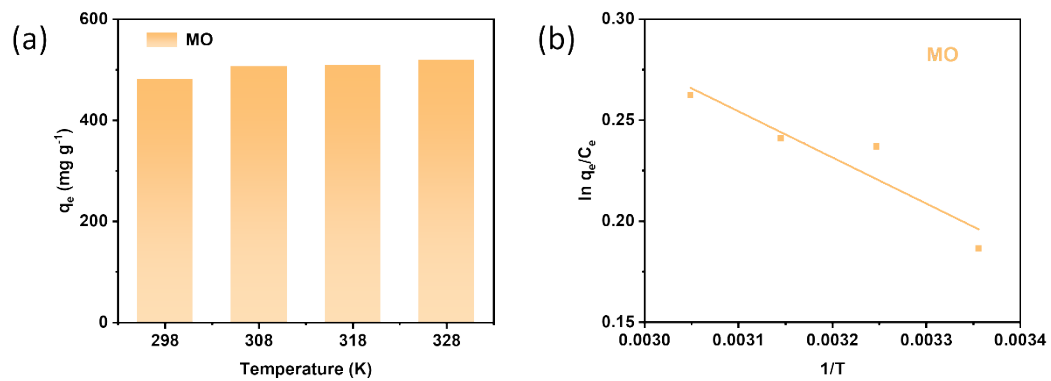

**Fig. S14** (a) Adsorption capacities of S-iCOF toward MO ( $C_0 = 400 \text{ mg L}^{-1}$ ) at different temperatures for 72 h. (b) Plots of  $\ln q_e/C_e$  against  $1/T$  for the adsorption of MO on S-iCOF.

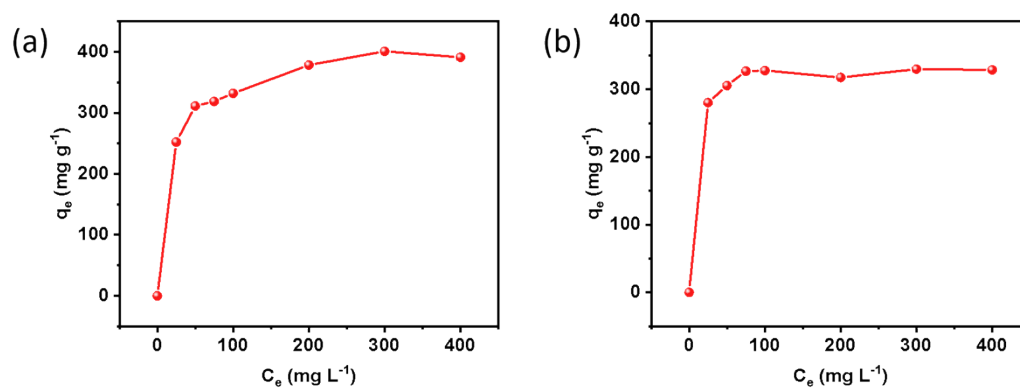

**Fig. S15** Adsorption isotherms of L-iCOF for (a) MO and (b) O II.



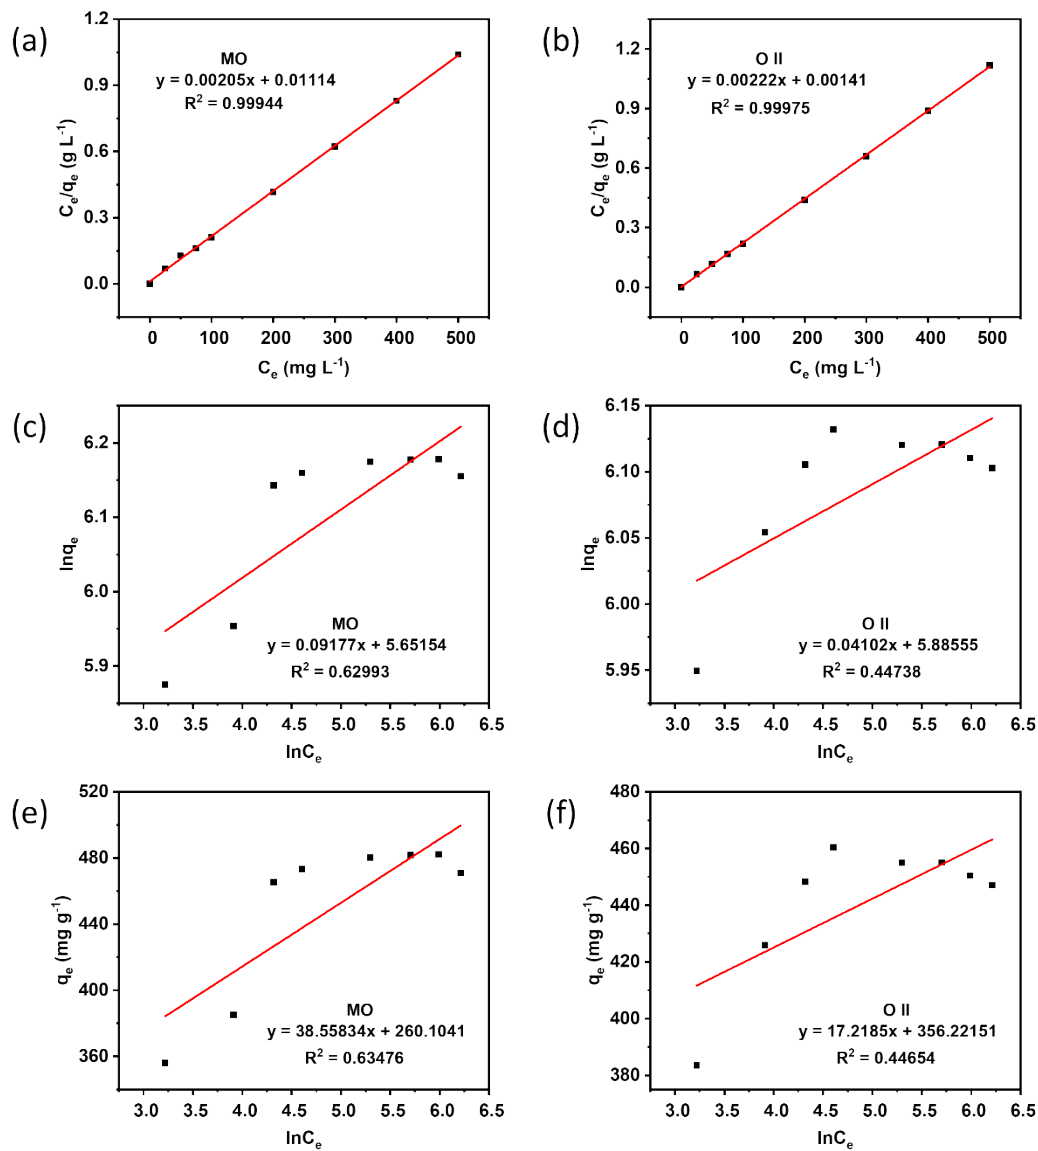

**Fig. S16** Plots of the fitting of MO adsorption experimental data with (a) Langmuir, (c) Freundlich and (e) Temkin isotherm modes, also O II adsorption experimental data with (b) Langmuir, (d) Freundlich and (f) Temkin isotherm modes.

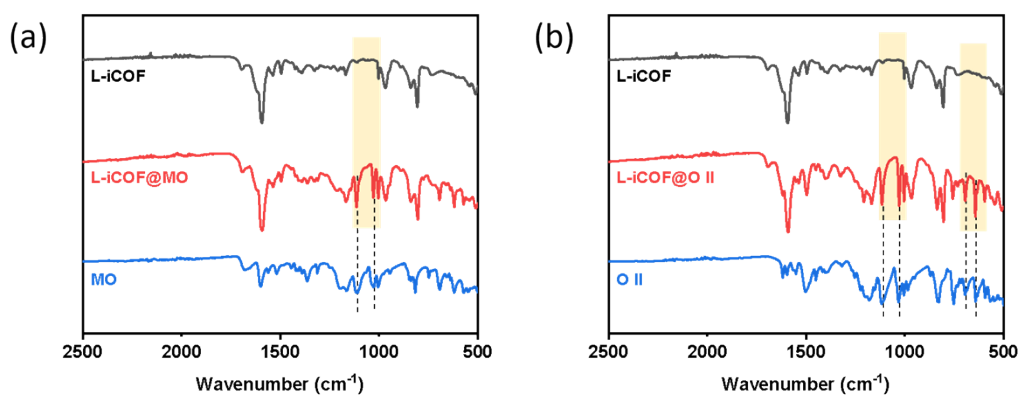

**Fig. S17** FTIR spectra of L-iCOF before and after adsorption with MO (a) and O II (b) and the dye itself.

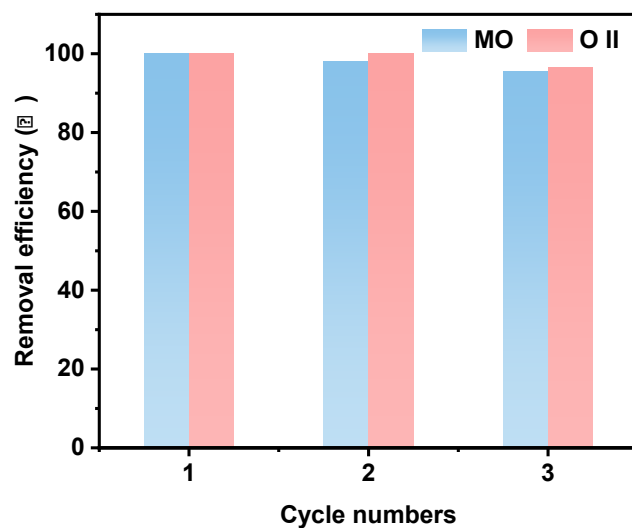

**Fig. S18** Recyclability of L-iCOF in MO ( $C_0 = 30 \text{ mg L}^{-1}$ ) and O II ( $C_0 = 30 \text{ mg L}^{-1}$ ) aqueous solution.

**Table S1** The equilibrium capacities, rate constant and correlation coefficient  $R^2$  of dyes adsorption on S-iCOF.

| Dye                               |                                               | MO      | OG 17   | O II    |
|-----------------------------------|-----------------------------------------------|---------|---------|---------|
| $q_{e,exp}$ (mg g <sup>-1</sup> ) |                                               | 364.32  | 349.63  | 381.5   |
| Pseudo-first-order                | $q_{e,cal}$ (mg g <sup>-1</sup> )             | 150.78  | 186.61  | 139.41  |
|                                   | $k_1$ (min <sup>-1</sup> )                    | 0.09017 | 0.26333 | 0.03080 |
|                                   | $R^2$                                         | 0.90602 | 0.96611 | 0.90940 |
| Pseudo-second-order               | $q_{e,cal}$ (mg g <sup>-1</sup> )             | 303.03  | 301.20  | 303.95  |
|                                   | $k_2$ (g mg <sup>-1</sup> min <sup>-1</sup> ) | 0.00309 | 0.00889 | 0.001   |
|                                   | $R^2$                                         | 0.99975 | 0.99994 | 0.99794 |

**Table S2** The thermodynamic parameters for the adsorption of MO on S-iCOF.

| Dyes | $\Delta H$<br>(kJ mol <sup>-1</sup> ) | $\Delta S$<br>(J mol <sup>-1</sup> k <sup>-1</sup> ) | $\Delta G$ (kJ mol <sup>-1</sup> ) |       |       |       |
|------|---------------------------------------|------------------------------------------------------|------------------------------------|-------|-------|-------|
|      |                                       |                                                      | 298 K                              | 308 K | 318 K | 328 K |
| MO   | 1.90                                  | 7.99                                                 | -0.48                              | -0.56 | -0.64 | -0.72 |

**Table S3** Comparison of adsorbents in this study with reported similar adsorbents towards MO.

| Adsorbent                       | Adsorption capacity<br>(MO, mg g <sup>-1</sup> ) | Ref.                                                                            |
|---------------------------------|--------------------------------------------------|---------------------------------------------------------------------------------|
| NH <sub>2</sub> -MIL-88(Fe)/COF | 106                                              | <i>Inorganic Chemistry Communications</i><br><b>172</b> (2025) 113475           |
| TAPT-HMIPA-COF                  | 185                                              | <i>Journal of Hazardous Materials</i><br><b>476</b> (2024) 135075               |
| MA-BA COF                       | 226                                              | <i>Journal of Environmental Chemical Engineering</i><br><b>11</b> (2023) 109890 |
| Benzodiimidazole-COF            | 256                                              | <i>European Polymer Journal</i><br><b>133</b> (2020) 109764                     |
| ICOF                            | 290                                              | <i>RSC Advances</i><br>(2023) Issue 34                                          |
| BiPy-MCOF                       | 421                                              | <i>Environmental Science and Pollution Research</i><br><b>30</b> (2023) 34669   |
| CEIL-S-KCC-1                    | 507                                              | <i>Journal of Colloid and Interface Science</i><br><b>679</b> (2025) 555        |
| <b>L-iCOF</b>                   | <b>401</b>                                       | <b>This study</b>                                                               |
| <b>S-iCOF</b>                   | <b>482</b>                                       | <b>This study</b>                                                               |

**Table S4** Comparison of adsorbents in this study with reported similar adsorbents towards O II.

| Adsorbent     | Adsorption capacity<br>(O II, mg g <sup>-1</sup> ) | Ref.                                                                                   |
|---------------|----------------------------------------------------|----------------------------------------------------------------------------------------|
| MC3           | 201                                                | <i>Journal of Hazardous Materials</i><br><b>424</b> (2022) 127401                      |
| Al13-Mt/C     | 250                                                | <i>Applied Clay Science</i><br><b>99</b> (2014) 229                                    |
| VA-GNR        | 265                                                | <i>Carbon Letters</i><br><b>30</b> (2020) 123                                          |
| AC-2          | 389                                                | <i>Journal of Cleaner Production</i><br><b>168</b> (2017) 22                           |
| Zr(IV)-CS-PT  | 476                                                | <i>International Journal of<br/>Biological Macromolecules</i><br><b>118</b> (2018) 340 |
| <b>L-iCOF</b> | <b>329</b>                                         | <b>This study</b>                                                                      |
| <b>S-iCOF</b> | <b>460</b>                                         | <b>This study</b>                                                                      |
